## CORRECTION

# Correction: Analysis of facial expressions in response to basic taste stimuli using artificial intelligence to predict perceived hedonic ratings

Takashi Yamamoto, Haruno Mizuta, Kayoko Ueji

The data for D:f(42) in [S2 Table](#) are incorrect. Please view the correct [S2 Table](#) below.

There is an error in the regression formula, which appears in the Results section and in the Supporting Information file [S2 Table](#). The first coefficient should have been 0.242 instead of 0.024. The correct formula is: Hedonic rating =  $0.242 \times \text{surprise/fear} + 0.138 \times \text{happiness} + 0.097 \times \text{neutral} + 0.055 \times \text{disgust} + 0.021 \times \text{sadness} + 0.031 \times \text{anger} - 0.584 \times \text{embarrassment} - 8.943$ .

## Supporting information

**S2 Table. Raw data for Figs 4 and 5.**  
(XLSX)

## Reference

1. Yamamoto T, Mizuta H, Ueji K (2021) Analysis of facial expressions in response to basic taste stimuli using artificial intelligence to predict perceived hedonic ratings. *PLoS ONE* 16(5): e0250928. <https://doi.org/10.1371/journal.pone.0250928> PMID: 33945568

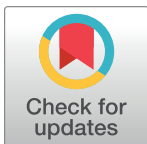

## OPEN ACCESS

**Citation:** Yamamoto T, Mizuta H, Ueji K (2021) Correction: Analysis of facial expressions in response to basic taste stimuli using artificial intelligence to predict perceived hedonic ratings. *PLoS ONE* 16(10): e0258707. <https://doi.org/10.1371/journal.pone.0258707>

**Published:** October 12, 2021

**Copyright:** © 2021 Yamamoto et al. This is an open access article distributed under the terms of the [Creative Commons Attribution License](#), which permits unrestricted use, distribution, and reproduction in any medium, provided the original author and source are credited.
